1 **Impact of early postoperative ambulation on gait recovery after hip fracture surgery: A**  
2 **multicenter cohort study**

3 **Short title:** Early ambulation after hip surgery

4 **Keisuke Nakamura, PhD, RPT<sup>a</sup>, Yasushi Kurobe, PhD, RPT<sup>b</sup>, Keita Sue, PhD, RPT<sup>c</sup>,**  
5 **Shinichi Sakurai, PhD, RPT<sup>d</sup>, Tomohiro Sasaki, MHSc, RPT<sup>e</sup>, Shuhei Yamamoto, PhD**  
6 **RPT<sup>f</sup>, Naoko Ushiyama, PhD, RPT<sup>b</sup>, Masahito Taga, MHSc, RPT<sup>g</sup>, Kimito Momose,**  
7 **PhD, RPT<sup>a</sup>**

8 <sup>a</sup>Department of Physical Therapy, School of Health Sciences, Shinshu University,  
9 Matsumoto, Japan.

10 <sup>b</sup>Department of Rehabilitation, Fujimi-Kogen Hospital, Fujimi-Kogen Medical Center,  
11 Fujimi town, Nagano, Japan.

12 <sup>c</sup>Department of Rehabilitation, JA Nagano Kouseiren, Kakeyu-Misayama Rehabilitation  
13 Center Kakeyu Hospital, Ueda, Nagano, Japan

14 <sup>d</sup>Department of Rehabilitation, Saku Central Hospital, Saku, Nagano, Japan

15 <sup>e</sup> Department of rehabilitation, Matsumoto City Hospital, Matsumoto, Nagano, Japan

16 <sup>f</sup>Department of Rehabilitation, Shinshu University Hospital, Matsumoto, Japan.

17 <sup>g</sup>Department of Rehabilitation, Ina Central Hospital, Japan.

18

19 **Corresponding author:** Keisuke Nakamura, PhD, RPT

20 Department of Physical Therapy, School of Health Sciences, Shinshu University, 3-1-1

21 Asahi, Matsumoto, Nagano 390-8621, Japan

22 E-mail: [keipons55@yahoo.co.jp](mailto:keipons55@yahoo.co.jp)

23 Tel.: +81-263-35-4600

24 **NOTE:** This preprint reports new research that has not been certified by peer review and should not be used to guide clinical practice.

25 **Abstract**

26 Objective: This study aimed to investigate the effect of early postoperative ambulation on  
27 gait recovery at the initial postoperative week and at discharge after hip fracture surgery in  
28 older patients.

29 Design: Multicenter prospective cohort study.

30 Setting and Participants: The study included 882 patients aged  $\geq 65$  years from 10 acute  
31 hospitals in Japan.

32 Methods: Patients were divided into two groups according to the interval between surgery  
33 and first ambulation: early-ambulation (EA) group (initiation of ambulation on postoperative  
34 day 1 or 2) and late-ambulation (LA) group (initiation of ambulation on postoperative day 3  
35 or later). The Functional Independence Measure (FIM) was assessed 1 day postoperatively, 1  
36 week postoperatively, and at discharge. Independent walking regardless of use of walking  
37 aids was defined as walking FIM  $\geq 5$ . Confounding variables were age, mobility and cognitive  
38 function before injury, medical history, fracture type, and waiting days for surgery.

39 Multivariate logistic regression analysis was conducted to determine whether EA affected  
40 independent walking at 1 week postoperatively and at discharge.

41 Results: The number of patients in the EA and LA groups was 292 (33.1%) and 590 (66.9%),  
42 respectively. The number of patients walking independently 1 week postoperatively and at  
43 discharge was 156 (17.7%) and 292 (33.1%), respectively. Multivariate logistic regression  
44 analysis revealed that EA was associated with independent walking at 1 week postoperatively  
45 (odds ratio [OR], 3.27; 95% confidence interval [CI], 2.17-4.94;  $P < .0001$ ) and at discharge  
46 after adjusting for confounders (OR, 3.33; 95% CI, 2.38-4.69;  $P < .0001$ ). EA was associated  
47 with the recovery to pre-injury walking status at discharge after adjusting for confounders  
48 (OR, 3.05; 95% CI, 1.59–5.93;  $P = .0009$ ).

49 Conclusion and Implications: Early ambulation after hip fracture surgery has an impact on  
50 independent walking and recovery of pre-injury walking status at 1 week postoperatively and  
51 at discharge from acute hospitals in older patients.

52

53

54

## Introduction

55 The global incidence of hip fracture is estimated at 16.75 million annually, and it is  
56 expected to increase further [1, 2]. Hip fractures significantly impact mobility, leading to  
57 increased mortality, refracture rates, and the need for care [3, 4]. Previous studies have shown  
58 that approximately 20%-30% of patients who can walk pre-fracture fail to recover their pre-  
59 fracture walking status at 2 weeks or 6 months [5, 6]. The inability to walk at hospital  
60 discharge is an independent predictor of 1-year mortality [4]. Therefore, enhancing  
61 postoperative mobility is crucial for reducing mortality and mitigating long-term care and  
62 health-care expenses.

63 The guidelines for hip fracture management has recommended that patients undergo  
64 physiotherapy assessment and, unless medically or surgically contraindicated, mobilization  
65 on the day after surgery because early mobilization is associated with survival and recovery  
66 for patients after hip fracture [7-9]. The National Hip Fracture Database defines mobilization  
67 as the ability to sit or stand out of bed with or without help [7, 10]. Previous studies have  
68 shown that early mobilization leads to reduced mortality, reduced hospital stay, and increased  
69 ambulatory recovery [7, 11-13]. However, research on the impact of the early initiation of  
70 gait practice on gait recovery after surgery remains limited. In a previous randomized  
71 controlled trial study, those who started ambulation practice within 48 h postoperatively had  
72 higher gait reacquisition at 1 week postoperatively and were more likely to be discharged  
73 home than those who started ambulation practice later [14]. The impact of initiating early  
74 postoperative ambulation practice on gait recovery after the initial postoperative week  
75 remains uncertain.

76 This multicenter study aimed to investigate the effect of early ambulation on gait  
77 recovery after hip fracture surgery in the initial postoperative week and at discharge. We  
78 hypothesized that early postoperative ambulation (initiation of ambulation on postoperative

79 day 1 or 2), would be associated with better gait recovery than late postoperative ambulation  
80 (initiation of ambulation on postoperative day 3 or later).

## 81 **Methods**

### 82 *Study Design and Participants*

83 This multicenter cohort study utilized the Nagano hip fracture database in Japan. This  
84 database contains information on the characteristics and rehabilitation outcomes of patients  
85 admitted with hip fracture, and between December 1, 2019, and July 31, 2023, data of 1613  
86 surgically treated consecutive patients from 17 hospitals were submitted. These data were  
87 collected through a cloud electronic data capture system from each hospital. Patients who  
88 were ambulatory, aged 65 years or older before the fracture, had a femoral neck or  
89 trochanteric fracture, and admitted to an acute care hospital were included in the study.  
90 Patients with postoperative weight-bearing restrictions were excluded from the study. A  
91 flowchart of the patient selection process is presented in Figure 1.

### **Figure 1. Patients' recruitment and flow diagram**

92  
93

94 All procedures were approved by the ethics committee of the School of Medicine,  
95 Shinshu University, on November 12, 2019 (protocol number 4541), and this study was  
96 performed according to the guidelines in the Declaration of Helsinki. Although this study did  
97 not require individual consent from participants, as it was an observational study and used  
98 anonymized data from normal medical practice, information on the conduct of the study was  
99 made public at each site. Participants were guaranteed the opportunity to opt out of the study  
100 at any time. Study details, including the objectives, inclusion and exclusion criteria, and  
101 primary outcome, were published in the publicly available University Hospital Information  
102 Network (UMIN-CTR, unique identifier: UMIN000054114).

103 *Measurement*

104 The database contains the following information: patient background factors such as age,  
 105 sex, body mass index, medical history (respiratory, cardiovascular, and neurological  
 106 diseases), cognitive function before injury, mobility before injury, place of residence before  
 107 admission, and residence after discharge, and medical factors such as fracture type, surgical  
 108 procedure, complications (deep vein thrombosis, peroneal nerve palsy, infection, and falls),  
 109 waiting days for surgery, waiting days for rehabilitation from admission, and rehabilitation  
 110 factors (postoperative days to the start the ambulation and rehabilitation intervention time).  
 111 Infections included pneumonia and urinary tract infections, and those diagnosed by a doctor  
 112 were defined as having an infection. Cognitive function was assessed using the Degree of  
 113 Daily Life Independence Score for People with Dementia (DDLIS-PD) [15, 16]. This  
 114 assessment has seven scales and is widely used to evaluate dementia in Japan. In this study,  
 115 cognitive impairment was defined as DDLIS-PD grade II, with independence by support with  
 116 some hindrances, or higher grades. Functional Independence Measure (FIM) [17] at 1 day  
 117 after surgery, 1 week postoperatively, and at discharge and walking status at discharge (e.g.,  
 118 walking without aids, with one-point cane, with walker and other aids) were assessed as  
 119 treatment outcomes.

120 **Table 1. Patients' demographic data**

|                               | All (n = 882)     | EA group (n = 292) | LA group (n = 590) | NMV |
|-------------------------------|-------------------|--------------------|--------------------|-----|
| Age (years)                   | 87 (81, 91)       | 84 (79, 89)        | 88 (83, 92)        | 0   |
| Sex: male                     | 201 (22.8)        | 70 (24.0)          | 131 (22.2)         | 0   |
| BMI (kg/m <sup>2</sup> )      | 20.1 (17.9, 22.6) | 20.3 (17.9, 22.9)  | 20.0 (17.9, 22.4)  | 4   |
| Pre-fracture living situation |                   |                    |                    | 0   |
| Own home                      | 727 (82.4)        | 263 (90.1)         | 464 (78.6)         |     |
| Nursing facility              | 155 (17.6)        | 29 (9.9)           | 126 (21.4)         |     |
| Pre-fracture walking status   |                   |                    |                    | 0   |
| Walking without aids          | 505 (57.3)        | 230 (78.8)         | 275 (46.6)         |     |

|                                                           |             |             |             |    |
|-----------------------------------------------------------|-------------|-------------|-------------|----|
| Walking with one-point cane                               | 147 (16.7)  | 30 (10.3)   | 117 (19.8)  |    |
| Walking with walker                                       | 230 (26.1)  | 32 (11.0)   | 198 (33.5)  |    |
| Cognitive impairment                                      | 405 (45.9)  | 89 (30.5)   | 316 (53.6)  | 0  |
| Medical comorbidities                                     |             |             |             | 0  |
| Respiratory disease                                       | 90 (10.2)   | 27 (9.2)    | 63 (10.7)   |    |
| Cardiovascular disease                                    | 228 (25.9)  | 68 (23.3)   | 160 (27.1)  |    |
| Neurological disease                                      | 145 (16.4)  | 48 (16.4)   | 97 (16.4)   |    |
| Fracture type                                             |             |             |             | 0  |
| Femoral neck                                              | 449 (50.9)  | 167 (57.2)  | 282 (47.8)  |    |
| Trochanteric                                              | 433 (49.1)  | 125 (42.8)  | 308 (52.2)  |    |
| Surgical treatment                                        |             |             |             | 0  |
| Osteosynthesis                                            | 560 (63.5)  | 177 (60.6)  | 383 (65.0)  |    |
| Artificial femoral head                                   | 322 (36.5)  | 115 (39.4)  | 207 (35.0)  |    |
| Complication during hospitalization                       |             |             |             |    |
| Falls                                                     | 34 (3.9)    | 11 (3.8)    | 23 (3.9)    | 1  |
| Peroneal nerve palsy                                      | 10 (1.1)    | 1 (0.3)     | 9 (1.5)     | 1  |
| DVT                                                       | 65 (7.4)    | 14 (4.8)    | 51 (8.7)    | 1  |
| Infection                                                 | 15 (1.7)    | 2 (0.7)     | 13 (2.2)    | 0  |
| FIM-All on the day after surgery                          | 45 (33, 53) | 52 (41, 59) | 41 (30, 51) | 6  |
| FIM-Motor on the day after surgery                        | 18 (17, 23) | 20 (18, 28) | 17 (16, 20) | 6  |
| FIM-Cognitive on the day after surgery                    | 25 (15, 32) | 30 (21, 35) | 22 (14, 30) | 6  |
| Waiting days for surgery                                  | 2 (1, 4)    | 2(1, 4)     | 3(1, 4)     | 0  |
| Time to first walk in rehabilitation after surgery (days) | 3 (2, 6)    | 2 (1, 2)    | 5 (3, 7)    | 77 |
| Time from surgery to discharge from hospital (days)       | 19 (14, 26) | 18 (13, 24) | 20 (15, 28) | 1  |
| Hospital stay (days)                                      | 22 (17, 29) | 21 (16, 27) | 23 (18, 30) | 1  |
| Destination after discharge                               |             |             |             | 2  |
| Own home                                                  | 101 (11.5)  | 56 (19)     | 45 (7.7)    |    |
| Rehabilitation facility                                   | 613 (69.7)  | 201 (66.9)  | 412 (70.1)  |    |

---

|                |            |          |            |
|----------------|------------|----------|------------|
| Other hospital | 27 (3.1)   | 7 (2.4)  | 20 (3.3)   |
| Nursing home   | 126 (14.3) | 22 (7.6) | 104 (17.7) |
| Others         | 11 (1.3)   | 6 (2.1)  | 5 (0.9)    |
| Death          | 2 (0.2)    | 0 (0)    | 2 (0.3)    |

---

121 Data are presented as numbers (percentages) or median (25th and 75th percentiles).  
122 NMV, number of missing values; BMI, body mass index; DVT, deep vein thrombosis; FIM,  
123 Functional Independence Measure; EA, early ambulation; LA, late ambulation.  
124

### 125 *Dependent Variables*

126 The main outcome was independent walking regardless of the use of aids, defined as  
127 mobility (walking) with FIM grade  $\geq 5$ , following the approach outlined by Fu et al [17]. A  
128 FIM score of  $\geq 5$  for walking indicates that the patient is able to walk with supervision or  
129 independently [18]. Walking ability was assessed 1 week postoperatively and at discharge.  
130 The secondary treatment outcome was walking recovery, which was defined as restoration of  
131 pre-fracture walking status and FIM grade  $\geq 5$ . The other treatment outcomes were FIM score  
132 at discharge, walking status at discharge (ambulating without or with one-point cane, walker,  
133 or wheelchair), and days from operation to discharge.

134

### 135 *Independent Variables*

136 The independent variable was early postoperative ambulation following hip fracture  
137 surgery. Patients were divided into two groups according to the interval between surgery and  
138 their first postoperative walk: the early-ambulation (EA) group (initiation of ambulation on  
139 postoperative day 1 or 2) and the late-ambulation (LA) group (initiation of ambulation on  
140 postoperative day 3 or later) [8, 14]. The date of ambulation initiation was defined as the date  
141 when a patient started ambulation regardless of the amount of the assistance or the use of  
142 walking aids.



143 We adjusted for confounding variables identified in previous studies, including age [19-  
144 23], walking status before injury [17, 21-25], cognitive impairment [12, 20-22, 24-26],  
145 preoperative medical history [18, 19, 21, 23] of respiratory, circulatory, and neurological  
146 diseases, fracture type [19, 21, 23, 24], and days from admission to surgery [6, 24], in the  
147 analysis of factors influencing postoperative walking independence.

148

#### 149 *Statistical Analyses*

150 Continuous variables are presented as median (25th and 75th percentile), whereas  
151 categorical variables are expressed as numbers and percentages. Pearson's chi-squared test,  
152 Fisher's exact test for count data, and Mann–Whitney U test were used to compare the  
153 rehabilitation factors and treatment outcomes between the EA and LA groups.

154 Multivariate logistic regression analysis was conducted to ascertain whether early  
155 postoperative ambulation initiation affected independent walking at 1 week postoperatively  
156 and at discharge. In this analysis, the dependent variable was whether the patient walked  
157 independently at 1 week postoperatively and at discharge, whereas the independent variable  
158 was early postoperative ambulation. All confounding factors were reduced to one composite  
159 characteristic by applying a propensity score. The propensity score, which reflected the  
160 likelihood of study participants being assigned to the EA or LA group, was used in logistic  
161 regression analysis as an independent variable [27]. Missing values were excluded because  
162 they represented <5% of the total [28].

163 As a sensitivity analysis to assess the influence of missing data on postoperative walking  
164 timing and recovery, we performed logistic regression analysis with multiple imputations of  
165 missing sites. To address missing data in the dataset, we performed multiple imputation using  
166 the “mice” package in R, version 4.3.2 (<https://www.r-project.org>), creating 20 complete  
167 datasets using methods such as predictive mean matching for continuous variables and

168 logistic regression for categorical variables. Subsequently, logistic regression models were  
169 applied to each imputed dataset, and the results across imputed datasets were integrated using  
170 Rubin's rules [29]. We further examined the potential impact of unknown confounders on the  
171 relationship between postoperative early first ambulation and independent walking by  
172 calculating the E-values (<https://www.evalue-calculator.com/>) [30, 31]. Statistical analyses  
173 were performed with R, version 4.3.2 (<https://www.r-project.org>). Statistical significance was  
174 set at  $P < .05$ .

175

## 176 **Results**

177 A total of 882 patients with a median age (25<sup>th</sup>, 75<sup>th</sup> percentiles) of 87 (81, 91) years from  
178 10 acute hospitals were included, with 292 (33.1%) and 590 (66.9%) patients in the EA and  
179 LA groups, respectively. The patients' demographic data are presented in Table 1. The  
180 median ages (25<sup>th</sup>, 75<sup>th</sup> percentiles) of the EA and LA groups were 84 (79, 89) and 88 (83,  
181 92) years, respectively; 78.8% and 46.6% walked without aids before the injury, and the  
182 percentages of cognitive impairment were 30.5% and 53.6%, respectively (Table 1).

183 The number of patients walking independently 1 week postoperatively and at discharge  
184 was 156 (17.7%) and 292 (33.1%), respectively. The proportion of patients walking  
185 independently at 1 week postoperatively and at discharge decreased with increasing duration  
186 to postoperative first ambulation (Supplementary Figure 1). The EA group had a significantly  
187 higher percentage of independent walking patients, defined as walking FIM grade  $\geq 5$  at 1  
188 week postoperatively and at discharge, than the LA group ( $P < .0001$ ) (Table 2). The EA  
189 group had significantly better treatment outcomes than the LA group, including walking  
190 status at discharge ( $P < .0001$ ) and FIM at discharge ( $P < .0001$ ) (Table 2).

191 **Table 2. Treatment outcomes**

|                                                | EA group (n = 292) | LA group (n = 590) | P-value | NMV |
|------------------------------------------------|--------------------|--------------------|---------|-----|
| Walking status at discharge                    |                    |                    | <.0001  | 13  |
| Walking without aids                           | 13 (4.5)           | 6 (1.0)            |         |     |
| Walking with one-point cane                    | 48 (16.5)          | 25 (4.3)           |         |     |
| Walking with walker                            | 110 (37.8)         | 90 (15.6)          |         |     |
| Wheelchair                                     | 120 (41.2)         | 455 (78.7)         |         |     |
| Death                                          | 0 (0)              | 2 (0.3)            |         |     |
| FIM-All at discharge                           | 84 (67, 100)       | 61 (43, 82)        | <.0001  | 18  |
| FIM-Motor at discharge                         | 55 (45, 68)        | 38 (24, 52)        | <.0001  | 18  |
| FIM-Cognitive at discharge                     | 31 (23, 35)        | 23 (15, 31)        | <.0001  | 18  |
| Walking FIM at 1 week postoperatively $\geq 5$ | 103 (36.7)         | 53 (9.2)           | <.0001  | 28  |
| Walking FIM at discharge $\geq 5$              | 171 (58.8)         | 121 (21.0)         | <.0001  | 15  |
| Recovery to pre-injury walking status          | 25 (8.6)           | 21 (3.6)           | .002    | 15  |

192 Data are presented as numbers (percentages) or median (25th and 75th percentiles).  
 193 NMV, number of missing values; FIM, Functional Independence Measure; EA, early  
 194 ambulation; LA, late ambulation.  
 195

196 Based on multivariate logistic regression analysis, EA ( $\leq 2$  days from surgery to first  
 197 ambulation) was associated with independent walking at 1 week postoperatively and at  
 198 discharge after adjusting for confounders, with odds ratios (ORs) of 3.27 (95% confidence  
 199 interval [CI], 2.17-4.94) and 3.33 (95% CI, 2.38-4.69), respectively (Table 3). Furthermore,  
 200 EA was associated with the recovery to pre-injury walking status at discharge after adjusting  
 201 for confounders, with OR of 3.05 (95% CI, 1.59-5.93) (Table 4).

202 **Table 3. Odds ratios for walking independence at 1 week postoperatively and at discharge from acute hospitals following early**  
 203 **postoperative initiation of ambulation in older patients who underwent hip fracture surgery**  
 204

| Variables                               | Patients   | Walking independently rate | Adjusted odds ratio*     | 95% CI |       | P-value | Adjusted odds ratio*     | 95% CI |       | P-value |
|-----------------------------------------|------------|----------------------------|--------------------------|--------|-------|---------|--------------------------|--------|-------|---------|
|                                         |            |                            |                          | Lower  | Upper |         |                          | Lower  | Upper |         |
| At 1 week postoperatively               |            |                            | Completed data (n = 858) |        |       |         | Multiple imputation data |        |       |         |
| LA (>2 days from surgery to first walk) | 590 (66.9) | 53 (9.2)                   | 1.00 [ref]               |        |       |         | 1.00 [ref]               |        |       |         |
| EA (≤2 days from surgery to first walk) | 292 (33.1) | 103 (36.7)                 | 3.27                     | 2.17   | 4.94  | <.0001  | 3.21                     | 2.14   | 4.83  | <.0001  |
| At discharge from acute hospital        |            |                            | Completed data (n = 867) |        |       |         | Multiple imputation data |        |       |         |
| LA (>2 days from surgery to first walk) | 590 (66.9) | 121 (21.0)                 | 1.00 [ref]               |        |       |         | 1.00 [ref]               |        |       |         |
| EA (≤2 days from surgery to first walk) | 292 (33.1) | 171 (58.8)                 | 3.33                     | 2.38   | 4.69  | <.0001  | 3.28                     | 2.34   | 4.59  | <.0001  |

CI, confidence interval; ref, reference; EA, early ambulation; LA, late ambulation.

205 \*Applying the propensity score calculated using a model for predicting the postoperative ambulation timing, whether early or late ambulation,  
 206 considering the confounding variables: age, preoperative walking ability, cognitive impairment, preoperative medical history of respiratory,  
 207 circulatory, and neurological diseases, fracture type, and preoperative waiting period.

208  
 209  
 210  
 211  
 212  
 213  
 214  
 215  
 216  
 217

218 **Table 4. Odds ratios for the recovery to pre-injury walking status following early postoperative initiation of ambulation in older patients**  
 219 **who underwent hip fracture surgery**

220  
 221  
 222

| Variables                                             | Patients,<br>n (%)     | Walking<br>recovery**<br>rate, n (%) | Adjusted<br>Odds Ratio* | 95%CI |       | p-value                  | Adjusted<br>Odds Ratio* | 95%CI |       | p-value |
|-------------------------------------------------------|------------------------|--------------------------------------|-------------------------|-------|-------|--------------------------|-------------------------|-------|-------|---------|
|                                                       |                        |                                      |                         | Lower | Upper |                          |                         | Lower | Upper |         |
| Recovery to pre-injury walking status<br>at discharge | Completed data (N=867) |                                      |                         |       |       | Multiple imputation data |                         |       |       |         |
| LA (>2 days from surgery to first<br>walk)            | 590 (66.9%)            | 21 (3.6)                             | 1.00 [ref]              |       |       |                          | 1.00 [ref]              |       |       |         |
| EA (≤ 2 days from surgery to first<br>walk)           | 292 (33.1%)            | 25 (8.6)                             | 3.05                    | 1.59  | 5.93  | 0.0009                   | 2.83                    | 1.47  | 5.44  | 0.001   |

223 CI, confidence interval; ref, reference; EA, early ambulation; LA, late ambulation

224 \* Applying propensity score calculated using a model to predict the postoperative ambulation timing, whether early or late ambulation,  
 225 considering the confounding variables: age, preoperative walking ability, cognitive impairment, preoperative medical history of respiratory,  
 226 circulatory, and neurological diseases, fracture type, and preoperative waiting period.

227 \*\* Walking recovery was defined as restoration of pre-fracture walking status and FIM grade ≥5.

228

Sensitivity analysis showed similar results for models with multiple assignments of missing values for the completed data models. Subsequently, to evaluate the influence of potential unmeasured confounders on the relationship between postoperative early first walk and independent walking at 1 week postoperatively and at discharge, we calculated the E-values, which were 3.02 and 3.05, respectively.

## **Discussion**

This multicenter cohort study investigated the effect of early postoperative ambulation on gait recovery at the initial postoperative week and at discharge after hip fracture surgery in older patients, and the results showed that the initiation of ambulation within 2 postoperative days after hip fracture surgery was associated with independent walking at 1 week postoperatively and at discharge. Furthermore, early postoperative ambulation may influence the recovery of walking to pre-injury status. Other effects of early initiation of ambulation were reduced length of hospital stay, discharge home, and improved ability to perform activities of daily living.

The effect of early ambulation initiation in the present study supports the results of previous research [14, 32]. Oldmeadow et al. conducted a study to evaluate the effects of early assisted ambulation, defined as the first walk on postoperative day 1 or 2, compared with delayed assisted ambulation, defined as the first walk on postoperative day 3 or 4, in an acute hospital setting. The results showed that at 1 week after surgery, the early ambulation group required less assistance for transfers and ambulation and walked farther [14]. In the present study, the results showed a longer-term effect on gait recovery at discharge (approximately 3 weeks postoperatively) by early ambulation initiation, similar to the results of previous studies [14]. The present study showed that early postoperative ambulation initiation was effective in independent walking and recovery of walking status before injury, even after adjusting for the confounding factors mentioned in previous studies, such as age

[19-23], pre-fracture mobility [17, 21-25], cognitive function [12, 20-22, 24-26], comorbidity disease [17, 20, 22], fracture type [19, 21, 23, 24], and days from admission to surgery [6, 24]. Oldmeadow et al. stated that cardiovascular stability is a major determinant of successful early ambulation after hip fracture surgery, and thus, the present study used the presence of cardiovascular disease as a confounding factor [14]. Although the association between early postoperative ambulation initiation and gait reacquisition in this study is unclear, it is possible that early ambulation initiation prevented disuse and increased the amount of ambulation practice prior to discharge compared with late ambulation initiation, which may have resulted in the reacquisition of independent walking. Shimizu et al. and Marsault et al. reported that higher physical activity during hospitalization for hip fracture patients was associated with higher ability to perform activities of daily living at discharge [33, 34]. However, these studies assessed physical activity for only a short period of 3 days to approximately 1 week [33, 34]; therefore, future studies are needed to investigate the relationships between postoperative physical activity and independent walking.

There are several unmeasured confounding factors in this study [35], such as pain [36], delirium [37], nutritional status [6, 25, 38], and inflammation [6, 32], which affect early postoperative ambulation initiation and gait reacquisition according to previous studies. Postoperative hip fracture-related pain was associated with a trochanteric fracture [36]; thus, we can potentially take into account the impact of pain on gait reacquisition by adjusting for the confounding factor of a trochanteric fracture. With regard to delirium, a previous study reported a strong association between delirium and cognitive decline [39]. The present study adjusted for cognitive decline as a confounding factor, which is believed to consider the influence of delirium. In the present study, to evaluate the influence of potential unmeasured confounders, we calculated the E-values, and the resulting E-values, 3.02 and 3.05, exceeded the odds ratio of unobserved confounders independently affecting the association between

early ambulation and postoperative ambulation, suggesting a minimal effect of unknown or unmeasured confounders on this association.

This study has some limitations. First, the reasons for not being able to start walking early postoperatively were unclear. Oldmeadow et al. reported that early postoperative ambulation initiation failed when patients were medically unstable [14]. Other studies have found that reasons for delaying mobilization include pain, fatigue, and habitual cognitive status [36]. Second, the effect of early postoperative ambulation initiation on long-term gait reacquisition 6 months or 1 year later is unknown. Finally, in this study, walking independence was defined as walking FIM  $\geq 5$ , which is the ability to walk independently with or without aids for at least 15 m, which indicates the least ability of independent indoor walking [18], similar to the findings of Fu et al. Some walking status assessments were used in the previous studies, such as FIM [17], the Iowa Level of Assistance scale [14, 32], the Cumulated Ambulation Score [12], and walking status according to use of walking aids [6, 21]. In the future, more applied assessments of walking ability will need to use outcomes other than the FIM.

The strengths of this study include the large population with a multicenter cohort, the prospective design, and the systematic data collection, which eliminate single-center bias and may increase the generalizability of the results. Furthermore, the selected outcomes are of great importance in clinical practice. In addition, the independent variables used in this study included the most important factors known to be associated with the outcomes. This study reflects daily clinical practice in the acute hospital.

### **Conclusions and Implications**

The study results indicate that initiating ambulation within 2 postoperative days after hip fracture surgery affects independent walking at postoperative week 1 and at discharge.



Furthermore, early postoperative ambulation may influence the recovery of walking to pre-injury status. However, the reasons for delayed ambulation postoperatively were unclear. Future investigation into the reasons for delayed ambulation could lead to a multidisciplinary team approach to encourage early ambulation within 2 days of surgery.

**Acknowledgements:** We thank all the participants who cooperated in our study as well as the rehabilitation staff in the cooperating hospitals for their assistance with data collection for the study.

## References

1. Takusari E, Sakata K, Hashimoto T, Fukushima Y, Nakamura T, Orimo H. Trends in hip fracture incidence in Japan: estimates based on nationwide hip fracture surveys from 1992 to 2017. *JBMR Plus*. 2021;5: e10428. doi: [10.1002/jbm4.10428](https://doi.org/10.1002/jbm4.10428).
2. Feng JN, Zhang CG, Li BH, Zhan SY, Wang SF, Song CL. Global burden of hip fracture: the Global Burden of Disease Study. *Osteoporos Int*. 2024;35: 41-52. doi: [10.1007/s00198-023-06907-3](https://doi.org/10.1007/s00198-023-06907-3).
3. Van Haecke A, Viste A, Desmarchelier R, Roy P, Mercier M, Fessy MH. Incidence and risk factors for bilateral proximal femoral fractures. *Orthop Traumatol Surg Res*. 2022;108: 102887. doi: [10.1016/j.otsr.2021.102887](https://doi.org/10.1016/j.otsr.2021.102887).
4. Dubljanin-Raspopović E, Markovic Denić L, Marinković J, Grajić M, Tomanovic Vujadinović S, Bumbaširević M. Use of early indicators in rehabilitation process to predict one-year mortality in elderly hip fracture patients. *Hip Int*. 2012;22: 661-667. doi: [10.5301/HIP.2012.10142](https://doi.org/10.5301/HIP.2012.10142).
5. Fukui N, Watanabe Y, Nakano T, Sawaguchi T, Matsushita T. Predictors for ambulatory ability and the change in ADL after hip fracture in patients with different levels

of mobility before injury: a 1-year prospective cohort study. *J Orthop Trauma*. 2012;26: 163-171. doi: [10.1097/BOT.0b013e31821e1261](https://doi.org/10.1097/BOT.0b013e31821e1261).

6. Mashimo S, Kubota J, Sato H, Saito A, Gilmour S, Kitamura N. The impact of early mobility on functional recovery after hip fracture surgery. *Disabil Rehabil*. 2023;45: 4388-4393. doi: [10.1080/09638288.2022.2151652](https://doi.org/10.1080/09638288.2022.2151652).

7. Goubar A, Martin FC, Potter C, Jones GD, Sackley C, Ayis S, et al. The 30-day survival and recovery after hip fracture by timing of mobilization and dementia: a UK database study. *Bone Joint J*. 2021;103–B: 1317-1324. doi: [10.1302/0301-620X.103B7.BJJ-2020-2349.R1](https://doi.org/10.1302/0301-620X.103B7.BJJ-2020-2349.R1).

8. National clinical guideline centre (UK). The management of hip fracture in adults. UK: Royal College of Physicians; 2011 (Published). p. 2023 (Updated).

9. Sheehan KJ, Goubar A, Martin FC, Potter C, Jones GD, Sackley C, et al. Discharge after hip fracture surgery in relation to mobilisation timing by patient characteristics: linked secondary analysis of the UK National Hip Fracture Database. *BMC Geriatr*. 2021;21: 694. doi: [10.1186/s12877-021-02624-w](https://doi.org/10.1186/s12877-021-02624-w).

10. Royal College of Physicians. Falls and fragility fracture audit programme. National Hip Fracture Database (NHFD) Annual Report. In: Royal College of Physicians; 2019.

11. Sheehan KJ, Goubar A, Almilaji O, Martin FC, Potter C, Jones GD, et al. Discharge after hip fracture surgery by mobilisation timing: secondary analysis of the UK National Hip Fracture Database. *Age Ageing*. 2021;50: 415-422. doi: [10.1093/ageing/afaa204](https://doi.org/10.1093/ageing/afaa204).

12. Yamamoto N, Tomita Y, Ichinose A, Sukegawa S, Yokoyama S, Noda T, et al. Cumulated ambulation score as predictor of postoperative mobility in patients with proximal femur fractures. *Arch Orthop Trauma Surg*. 2023;143: 1931-1937. doi: [10.1007/s00402-022-04401-9](https://doi.org/10.1007/s00402-022-04401-9).

13. Ferris H, Brent L, Coughlan T. Early mobilisation reduces the risk of in-hospital mortality following hip fracture. *Eur Geriatr Med.* 2020;11: 527-533. doi: [10.1007/s41999-020-00317-y](https://doi.org/10.1007/s41999-020-00317-y).
14. Oldmeadow LB, Edwards ER, Kimmel LA, Kipen E, Robertson VJ, Bailey MJ. No rest for the wounded: early ambulation after hip surgery accelerates recovery. *ANZ J Surg.* 2006;76: 607-611. doi: [10.1111/j.1445-2197.2006.03786.x](https://doi.org/10.1111/j.1445-2197.2006.03786.x).
15. Obayashi K, Masuyama S. Pilot and feasibility study on elderly support services using communicative robots and monitoring sensors integrated with cloud robotics. *Clin Ther.* 2020;42: 364–371.e4. doi: [10.1016/j.clinthera.2020.01.001](https://doi.org/10.1016/j.clinthera.2020.01.001).
16. Nakanishi K, Kanda T, Kobata T, Mori M, Yamada S, Kasamaki Y. New score including daily life independence levels with dementia is associated with the onset of deep vein thrombosis in frail older adults. *Geriatr Gerontol Int.* 2020;20: 414-421. doi: [10.1111/ggi.13873](https://doi.org/10.1111/ggi.13873).
17. Fu G, Li M, Xue Y, Wang H, Zhang R, Ma Y, et al. Rapid preoperative predicting tools for 1-year mortality and walking ability of Asian elderly femoral neck fracture patients who planned for hip arthroplasty. *J Orthop Surg Res.* 2021;16: 455. doi: [10.1186/s13018-021-02605-0](https://doi.org/10.1186/s13018-021-02605-0).
18. Hamilton BB, Laughlin JA, Fiedler RC, Granger CV. Interrater reliability of the 7-level functional independence measure (FIM). *Scand J Rehabil Med.* 1994;26: 115-119.
19. Bellelli G, Noale M, Guerini F, Turco R, Maggi S, Crepaldi G, et al. A prognostic model predicting recovery of walking independence of elderly patients after hip-fracture surgery. An experiment in a rehabilitation unit in Northern Italy. *Osteoporos Int.* 2012;23: 2189-2200. doi: [10.1007/s00198-011-1849-x](https://doi.org/10.1007/s00198-011-1849-x).
20. Doherty WJ, Stubbs TA, Chaplin A, Reed MR, Sayer AA, Witham MD, et al. Prediction of postoperative outcomes following hip fracture surgery: independent validation

and recalibration of the Nottingham Hip Fracture Score. *J Am Med Dir Assoc.* 2021;22: 663–669.e2. doi: [10.1016/j.jamda.2020.07.013](https://doi.org/10.1016/j.jamda.2020.07.013).

21. Oba T, Makita H, Inaba Y, Yamana H, Saito T. New scoring system at admission to predict walking ability at discharge for patients with hip fracture. *Orthop Traumatol Surg Res.* 2018;104: 1189-1192. doi: [10.1016/j.otsr.2018.07.024](https://doi.org/10.1016/j.otsr.2018.07.024).

22. Tam TL, Tsang KK, Lee KB. Development of a prognostic model to predict post-operative mobility of patients with fragility hip fractures: a retrospective cohort study. *Int J Orthop Trauma Nurs.* 2020;38: 100770. doi: [10.1016/j.ijotn.2020.100770](https://doi.org/10.1016/j.ijotn.2020.100770).

23. Pajulammi HM, Pihlajamäki HK, Luukkaala TH, Nuotio MS. Pre- and perioperative predictors of changes in mobility and living arrangements after hip fracture--a population-based study. *Arch Gerontol Geriatr.* 2015;61: 182-189. doi: [10.1016/j.archger.2015.05.007](https://doi.org/10.1016/j.archger.2015.05.007).

24. González de Villaumbrosia C, Sáez López P, Martín de Diego I, Lancho Martín C, Cuesta Santa Teresa M, Alarcón T, et al. Predictive model of gait recovery at one month after hip fracture from a national cohort of 25,607 patients: the Hip Fracture Prognosis (HF-Prognosis) Tool. *IJERPH.* 2021;18. doi: [10.3390/ijerph18073809](https://doi.org/10.3390/ijerph18073809).

25. Tomita Y, Yamamoto N, Inoue T, Noda T, Kawasaki K, Ozaki T. Clinical prediction model for postoperative ambulatory ability outcomes in patients with trochanteric fractures. *Injury.* 2021;52: 1826-1832. doi: [10.1016/j.injury.2021.04.043](https://doi.org/10.1016/j.injury.2021.04.043).

26. Kamimura T, Kobayashi Y, Tamaki S, Koinuma M. Impact of prefracture cognitive impairment and postoperative delirium on recovery after hip fracture surgery. *J Am Med Dir Assoc.* 2024;25: 104961. doi: [10.1016/j.jamda.2024.01.030](https://doi.org/10.1016/j.jamda.2024.01.030).

27. Biondi-Zoccai G, Romagnoli E, Agostoni P, Capodanno D, Castagno D, D'Ascenzo F, et al. Are propensity scores really superior to standard multivariable analysis? *Contemp Clin Trials.* 2011;32: 731-740. doi: [10.1016/j.cct.2011.05.006](https://doi.org/10.1016/j.cct.2011.05.006).

28. Lee KJ, Tilling KM, Cornish RP, Little RJA, Bell ML, Goetghebeur E, et al. Framework for the treatment and reporting of missing data in observational studies: the Treatment and Reporting of Missing data in Observational Studies framework. *J Clin Epidemiol.* 2021;134: 79-88. doi: [10.1016/j.jclinepi.2021.01.008](https://doi.org/10.1016/j.jclinepi.2021.01.008).
29. Marshall A, Altman DG, Holder RL, Royston P. Combining estimates of interest in prognostic modelling studies after multiple imputation: current practice and guidelines. *BMC Med Res Methodol.* 2009;9: 57. doi: [10.1186/1471-2288-9-57](https://doi.org/10.1186/1471-2288-9-57).
30. VanderWeele TJ, Ding P. Sensitivity analysis in observational research: introducing the E-value. *Ann Intern Med.* 2017;167: 268-274. doi: [10.7326/M16-2607](https://doi.org/10.7326/M16-2607).
31. Mathur MB, Ding P, Riddell CA, VanderWeele TJ. Web site and R package for computing E-values. *Epidemiology.* 2018;29: e45-e47. doi: [10.1097/EDE.0000000000000864](https://doi.org/10.1097/EDE.0000000000000864).
32. Morri M, Forni C, Marchioni M, Bonetti E, Marseglia F, Cotti A. Which factors are independent predictors of early recovery of mobility in the older adults' population after hip fracture? a cohort prognostic study. *Arch Orthop Trauma Surg.* 2018;138: 35-41. doi: [10.1007/s00402-017-2803-y](https://doi.org/10.1007/s00402-017-2803-y).
33. Shimizu T, Kanai C, Asakawa Y. Relationship between independence in activities of daily living at discharge and physical activity at admission of older postoperative hip fracture rehabilitation inpatients: a retrospective case-control study. *Physiother Res Int.* 2024;29: e2070. doi: [10.1002/pri.2070](https://doi.org/10.1002/pri.2070).
34. Marsault LV, Ryg J, Madsen CF, Holsgaard-Larsen A, Lauritsen J, Schmal H. Objectively measured physical activity and its association with functional independence, quality of life and in-hospital course of recovery in elderly patients with proximal femur fractures: a prospective cohort study. *Rehabil Res Pract.* 2020;2020: 5907652. doi: [10.1155/2020/5907652](https://doi.org/10.1155/2020/5907652).

35. Xu BY, Yan S, Low LL, Vasanwala FF, Low SG. Predictors of poor functional outcomes and mortality in patients with hip fracture: a systematic review. *BMC Musculoskelet Disord*. 2019;20: 568. doi: [10.1186/s12891-019-2950-0](https://doi.org/10.1186/s12891-019-2950-0).
36. Münter KH, Clemmesen CG, Foss NB, Palm H, Kristensen MT. Fatigue and pain limit independent mobility and physiotherapy after hip fracture surgery. *Disabil Rehabil*. 2018;40: 1808-1816. doi: [10.1080/09638288.2017.1314556](https://doi.org/10.1080/09638288.2017.1314556).
37. Marcantonio ER, Flacker JM, Michaels M, Resnick NM. Delirium is independently associated with poor functional recovery after hip fracture. *J Am Geriatr Soc*. 2000;48: 618-624. doi: [10.1111/j.1532-5415.2000.tb04718.x](https://doi.org/10.1111/j.1532-5415.2000.tb04718.x).
38. Lieberman D, Friger M, Lieberman D. Inpatient rehabilitation outcome after hip fracture surgery in elderly patients: a prospective cohort study of 946 patients. *Arch Phys Med Rehabil*. 2006;87: 167-171. doi: [10.1016/j.apmr.2005.10.002](https://doi.org/10.1016/j.apmr.2005.10.002).
39. Yang Y, Zhao X, Dong T, Yang Z, Zhang Q, Zhang Y. Risk factors for postoperative delirium following hip fracture repair in elderly patients: a systematic review and meta-analysis. *Aging Clin Exp Res*. 2017;29: 115-126. doi: [10.1007/s40520-016-0541-6](https://doi.org/10.1007/s40520-016-0541-6).

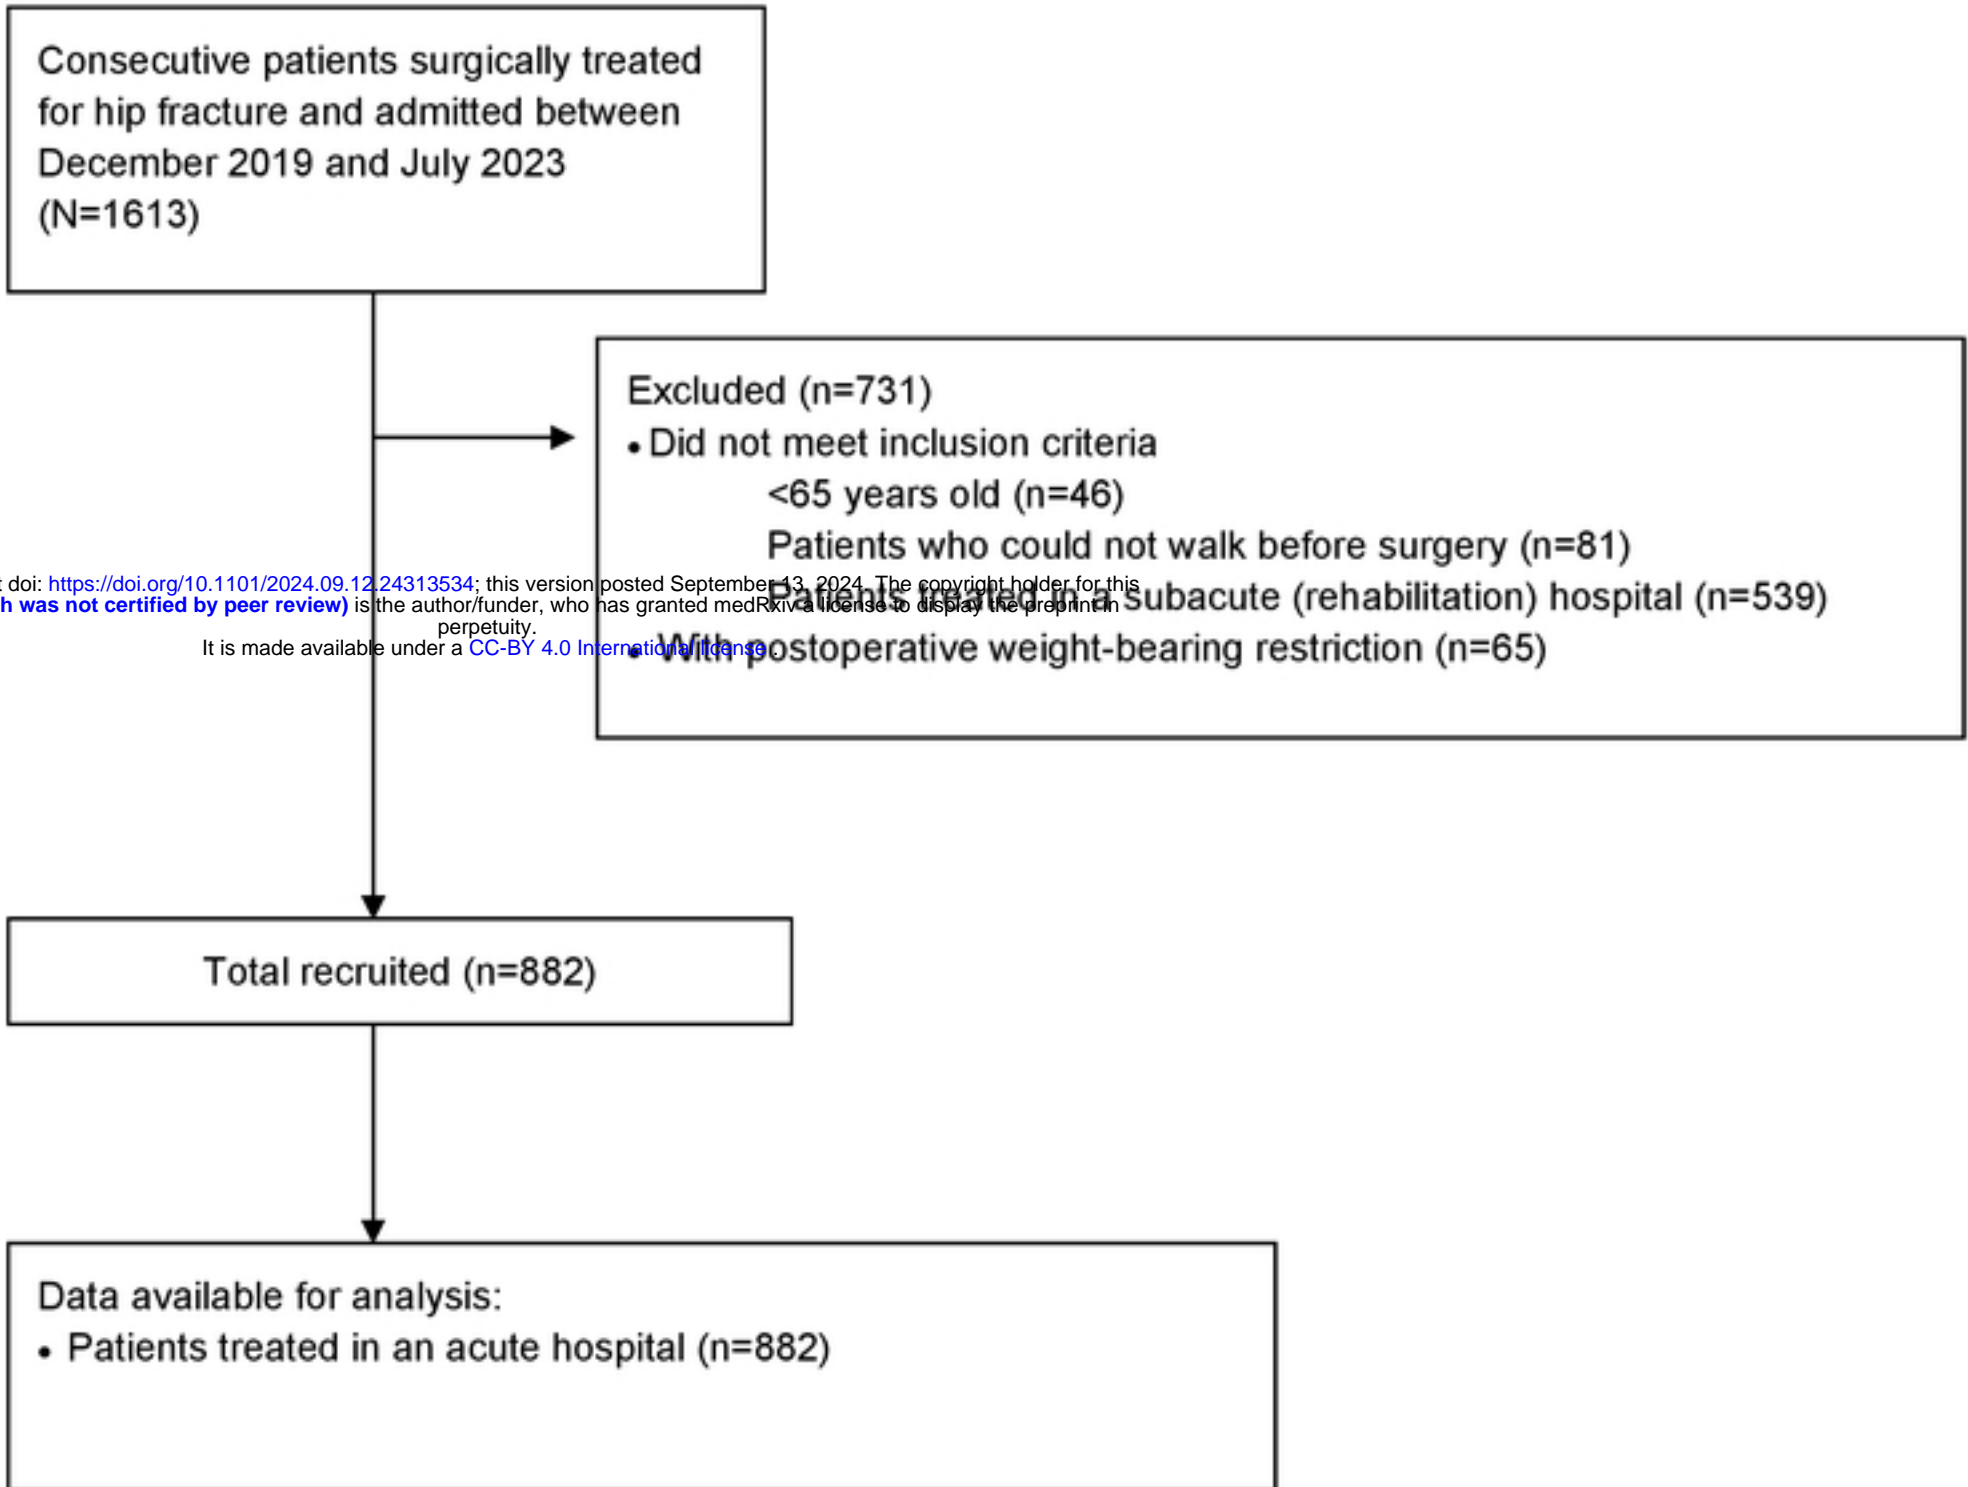

medRxiv preprint doi: <https://doi.org/10.1101/2024.09.12.24313534>; this version posted September 13, 2024. The copyright holder for this preprint (which was not certified by peer review) is the author/funder, who has granted medRxiv a license to display the preprint in perpetuity. It is made available under a [CC-BY 4.0 International license](https://creativecommons.org/licenses/by/4.0/).
